# Supplementary material for: Synthesis and characterisation of mesoporous aluminophosphates containing boronElectronic supplementary information (ESI) available: thermogravimetric analysis of mesostructured BAPO,XRD patterns of Hex-2 BAPO,27Al MAS NMR spectra of intermediate products formed during the synthesis of Hex-1 BAPO, 11B MAS NMR spectra of Hex-2 BAPO. See http://www.rsc.org/suppdata/jm/b1/b106911j/
Source: Royal Society of Chemistry journal article supplement (doi:10.1039/b106911j), 2002-02-28
Supplement: b106911j(a).doc [file b106911j%28a%29.doc]

**Electronic supplementary information**

Proofs and correspondence to:

Professor J. Klinowski

Department of Chemistry, University of Cambridge

Lensfield Road, Cambridge CB2 1EW, U.K.

telephone: 01223–33 65 14 **paper B106911J**

FAX: 01223–33 63 62 **revised manuscript**

e-mail: [jk18@cam.ac.uk](mailto:jk18@cam.ac.uk) **18 December 2001**

Synthesis and Characterisation of Mesoporous Aluminophosphates Containing Boron

**Yaroslav Z. Khimyak and Jacek Klinowski**

Department of Chemistry, University of Cambridge,

Lensfield Road, Cambridge CB2 1EW, U.K.

**Abstract.** Mesostructured and mesoporous boroaluminophosphates (BAPO’s) were synthesised using cationic templating in the presence of boric acid. The products were characterised by X-ray diffraction, 27Al, 31P and 11B solid-state NMR, thermal and elemental analysis, and nitrogen adsorption. Boron is incorporated into the structure, leading to a decrease in the degree of condensation of the inorganic component and to reduced thermal stability. Both tetrahedral and trigonal B is present in the structure of as-synthesised and calcined BAPO, but the B(4)/B(3) ratio is significantly reduced upon calcination. The kinetics of product formation products were studied and the likely mechanism of the synthesis is suggested, involving the formation of boroaluminophosphate oligomers which then react with the surfactant cations.

**Table S1.** Thermogravimetric analysis of mesostructured BAPO.

**Figure S1.** XRD patterns of Hex‑2 BAPO.

**Figure S2.** 27Al MAS NMR spectra of intermediate products formed during the synthesis of Hex‑1 BAPO.

**Figure S3.**  11B MAS NMR spectra of Hex-2 BAPO.
