# Supplementary material for: Synthesis and characterisation of mesoporous aluminophosphates containing boronElectronic supplementary information (ESI) available: thermogravimetric analysis of mesostructured BAPO,XRD patterns of Hex-2 BAPO,27Al MAS NMR spectra of intermediate products formed during the synthesis of Hex-1 BAPO, 11B MAS NMR spectra of Hex-2 BAPO. See http://www.rsc.org/suppdata/jm/b1/b106911j/
Source: Royal Society of Chemistry journal article supplement (doi:10.1039/b106911j), 2002-02-28
Supplement: b106911j(b).doc [file b106911j%28b%29.doc]

# Supplementary data

### Table S1. Thermogravimetric analysis of mesostructured BAPO’s.

| **Sample** | **Al : B** | **Step I** | | **Step II** | | **Step III** | | **Total W. L., %** | **III/II** |
| --- | --- | --- | --- | --- | --- | --- | --- | --- | --- |
| **T, °C** | **W.L., %** | **T, °C** | **W.L., %** | **T, °C** | **W.L., %** |
| **Hex‑1** | 25 | 98.0 | 9.83 | 246.4 | 24.3 | 343.3 | 26.9 | 61.1 | 1.11 |
| 10 | 70.7 | 9.19 | 260.6 | 21.3 | 340.8 | 27.6 | 58.1 | 1.30 |
| 5 | 81.5 | 8.38 | 254.1 | 22.6 | 342.5 | 28.1 | 59.1 | 1.24 |
| 2.5 | 91.7 | 8.82 | 253.7 | 21.2 | 343.7 | 28.5 | 58.5 | 1.34 |
| **Hex‑2** | 25 | 84.6 | 10.3 | 244.9 | 27.7 | 337.9 | 27.8 | 65.9 | 1.00 |
| 10 | 71.1 | 8.58 | 244.9 | 28.9 | 334.4 | 27.9 | 65.4 | 0.97 |
| 5 | 82.7 | 9.02 | 243.7 | 28.6 | 340.3 | 28.6 | 66.2 | 1.00 |
| 2.5 | 79.9 | 9.12 | 242.2 | 28.1 | 333.7 | 29.5 | 66.7 | 1.05 |
