# Supplementary material for: Synthesis and characterisation of mesoporous aluminophosphates containing boronElectronic supplementary information (ESI) available: thermogravimetric analysis of mesostructured BAPO,XRD patterns of Hex-2 BAPO,27Al MAS NMR spectra of intermediate products formed during the synthesis of Hex-1 BAPO, 11B MAS NMR spectra of Hex-2 BAPO. See http://www.rsc.org/suppdata/jm/b1/b106911j/
Source: Royal Society of Chemistry journal article supplement (doi:10.1039/b106911j), 2002-02-28
Supplement: b106911j(c).doc [file b106911j%28c%29.doc]

# Supplementary data

**Figure S1.** XRD patterns of Hex‑2 BAPO.
